# Supplementary material for: Authentic Research Investigations of a Controversial Question
Source: Oxford University Press journal article supplement (doi:10.1525/abt.2021.83.4.222), 2021-04-01
Supplement: s3_project_brainstorming.docx [file s3_project_brainstorming.docx]

Names:

Research Question:

Hypothesis:

Background Information:

Design set-up:

Timeline:

| S | M | T | W | R | F | S |
| --- | --- | --- | --- | --- | --- | --- |
|  | 29  Final Project Introduction | 30 | 1 | 2 | 3  Quiz | 4 |
| 5 | 6  Chapter 5 | 7 | 8 | 9 | 10 Quiz | 11 |
| 12 | 13  Chapter 6 | 14 | 15 | 16 | 17 Quiz | 18 |
| 19 | 20 Work on projects | 21 | 22  SENIOR FINALS (1,2,3,4) | 23  SENIOR FINALS (7,6,3,5) | 24  SENIOR GRADES DUE | 25 |
| 26  NO BLOCK | 27  MEMORIAL DAY | 28 | 29  QUIET DAY | 30  QUIET DAY | 31  QUIET DAY | 1 |
| 2 | 3  FINALS (1,2,3) | 4  FINALS (4,5) | 5  FINALS (6,7) | 6 | 7 | 8 |

Teacher approval: __________________________________
