# Supplementary material for: Authentic Research Investigations of a Controversial Question
Source: Oxford University Press journal article supplement (doi:10.1525/abt.2021.83.4.222), 2021-04-01

Poster dimensions: 48”x36” or 54”x36”

Graded out of 50 points

Information:

| Title  Authors | | |
| --- | --- | --- |
| *Introduction*  Purpose:  Hypothesis:  *Materials and Methods:*  bullet-point procedure  Picture(s) of setup | *Results*  Represent data in numbers, graphs, tables, and figures as much as possible  Very little text: only titles, axes, labels | *Discussion*   - Bullet point discussion of results   *Conclusion*  *Works cited* |

Rules:

- Less text, more figures
- Information should be conveyed clearly and accurately
- Make sure all figures are titled and labeled, especially graphs

Other resources on posters:

- <https://guides.nyu.edu/posters>
- <https://dukeahead.duke.edu/sites/dukeahead.duke.edu/files/u94/Poster%20Creation%20Presentation.pdf>
- <https://hsp.berkeley.edu/sites/default/files/ScientificPosters.pdf>
- Sample poster: <http://huttenhower.sph.harvard.edu/sites/default/files/pictures/csb_poster_06-14-05.png>
-
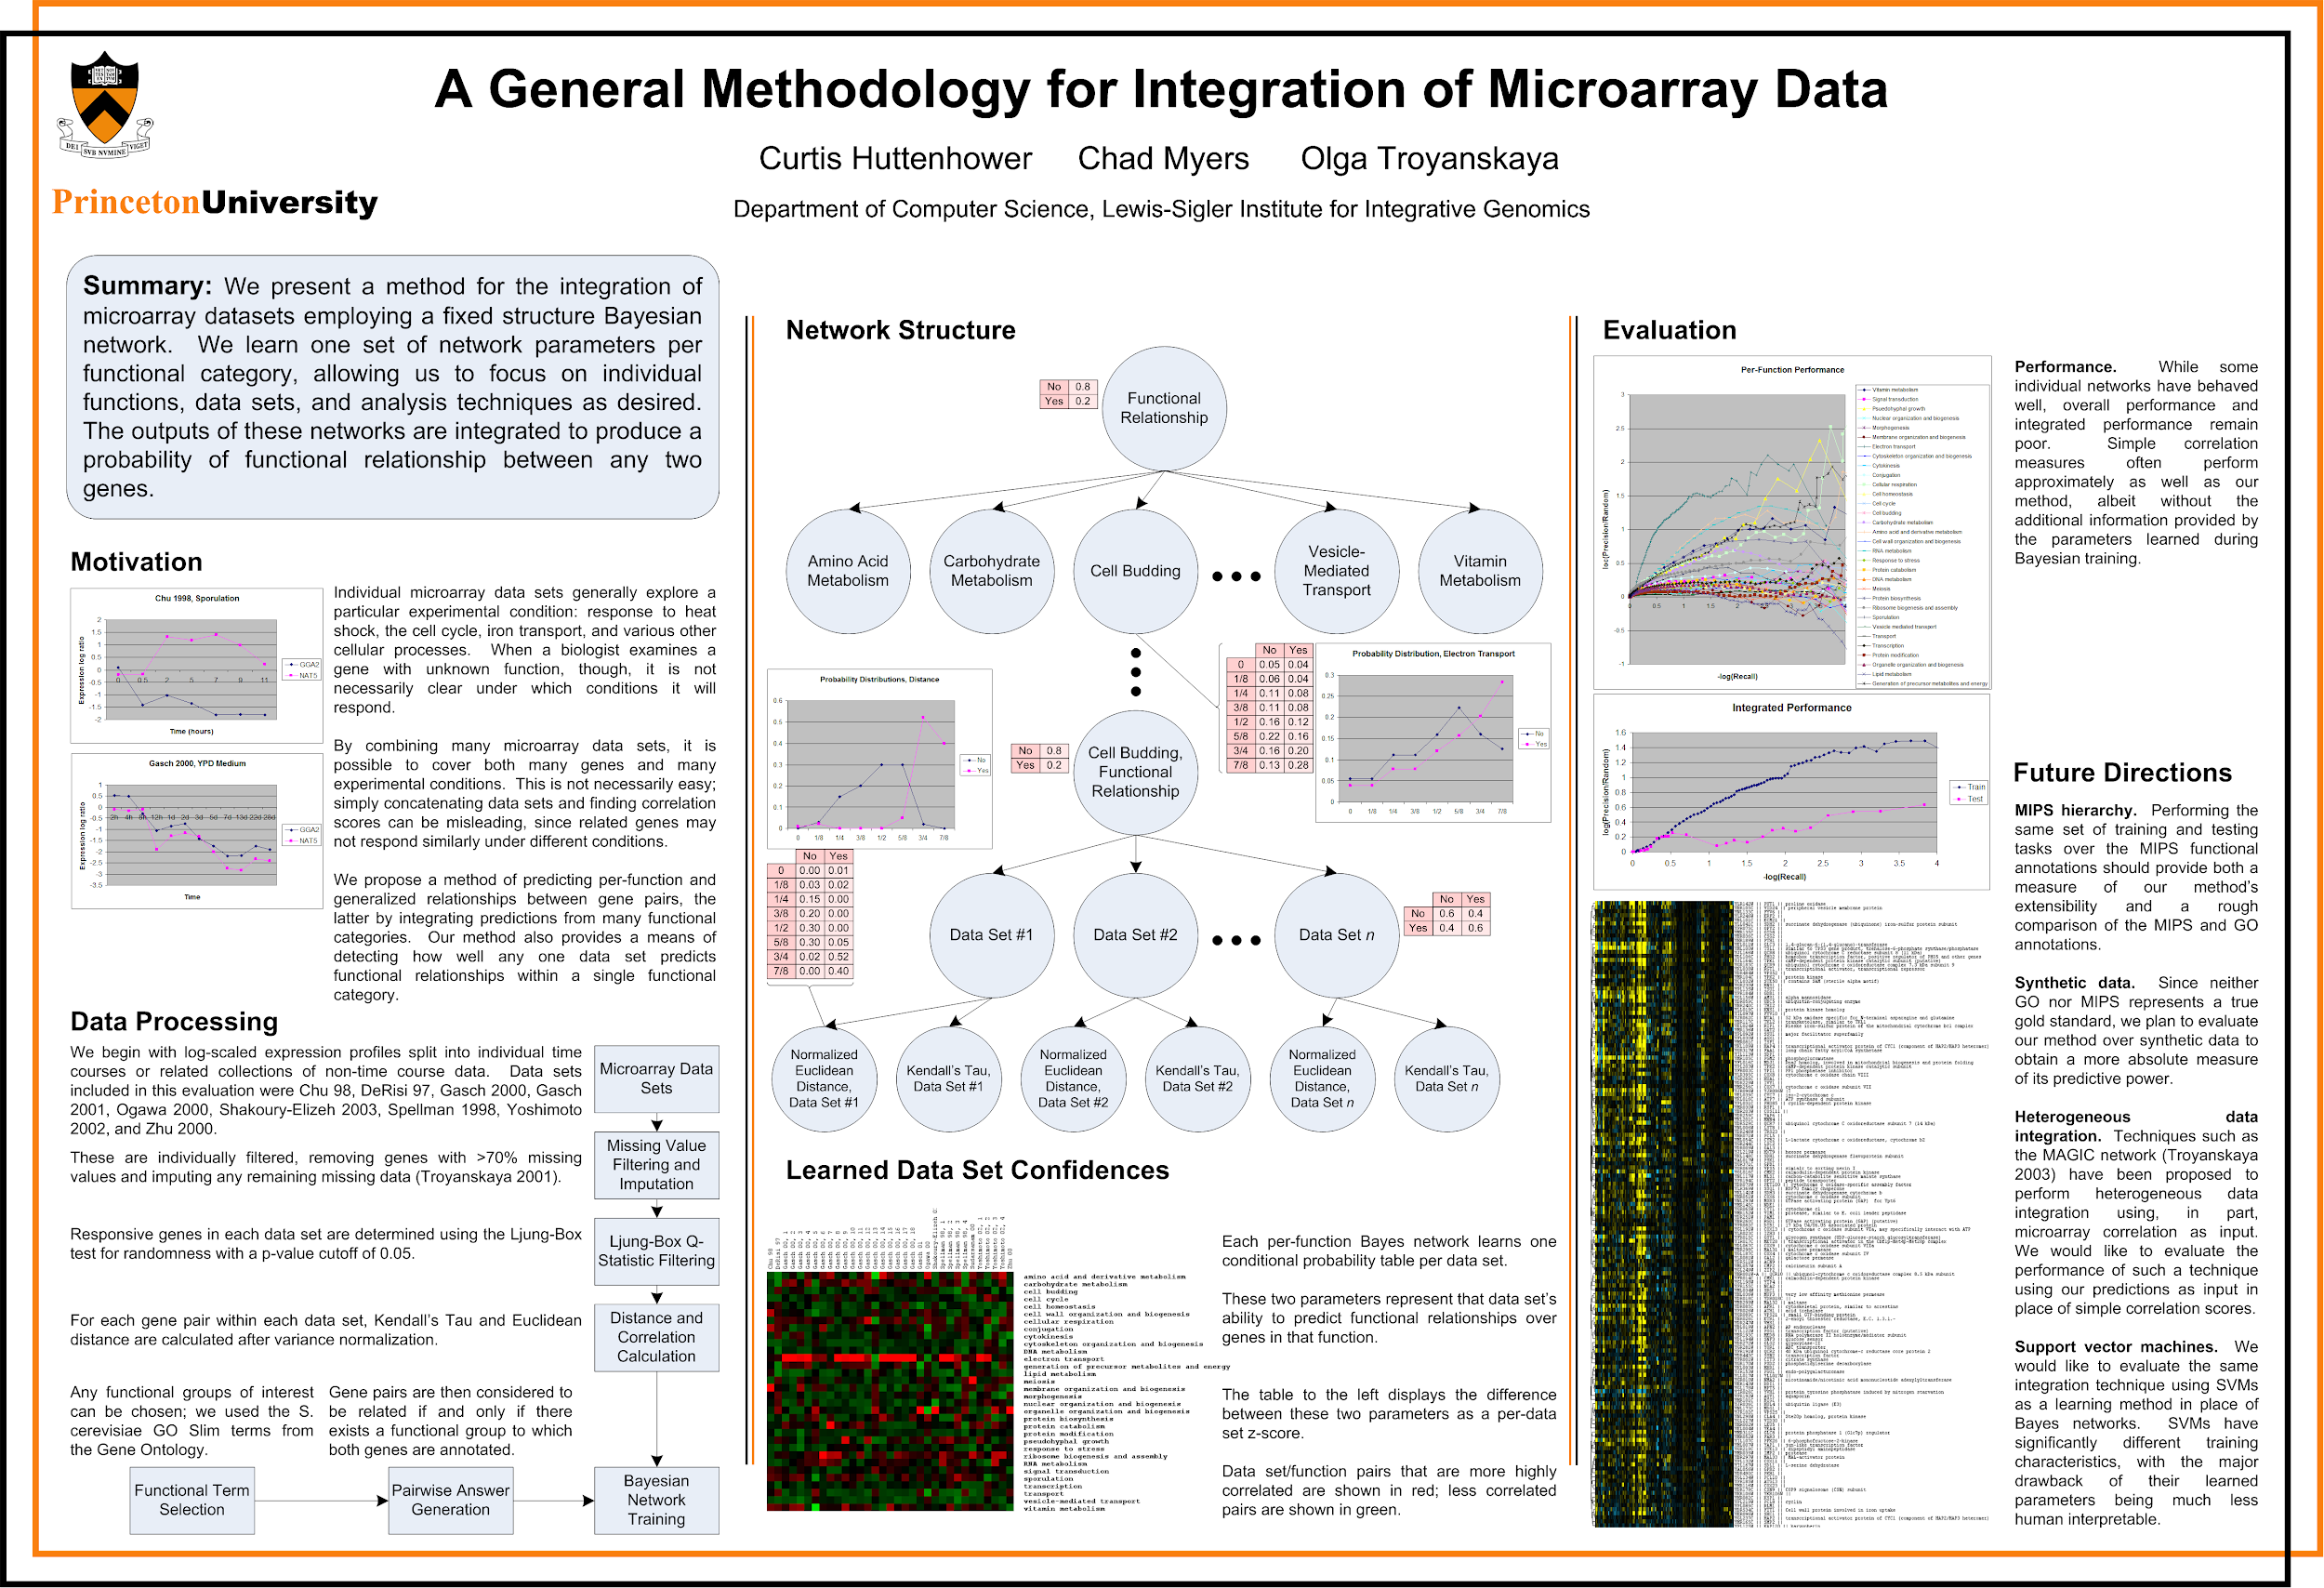

Supplement: s5_final_poster_guidelines.docx [file s5_final_poster_guidelines.docx]
