# Supplementary material for: Authentic Research Investigations of a Controversial Question
Source: Oxford University Press journal article supplement (doi:10.1525/abt.2021.83.4.222), 2021-04-01
Supplement: s6_grading_rubric.docx [file s6_grading_rubric.docx]

| **Item** | **Points** | **Scaling** |
| --- | --- | --- |
| Introduction | 5 4 3 2 1 | x3: |
| Materials and Methods | 5 4 3 2 1 | x4: |
| Results and Discussion | 5 4 3 2 1 | x4: |
| Conclusion | 5 4 3 2 1 | x2: |
| Quality of graphs and figures | 5 4 3 2 1 | x3: |
| Quality of data analysis and interpretation | 5 4 3 2 1 | x3: |
| References | 5 4 3 2 1 | x1: |
| Total | | /100 |
